# Supplementary material
Source: Springer Nature journal article supplement (https://www.springermedizin.de/resource/supplementary/13099_2012_61_MOESM1_ESM.pdf/9665512)

## Jan 2009-Jun 2010

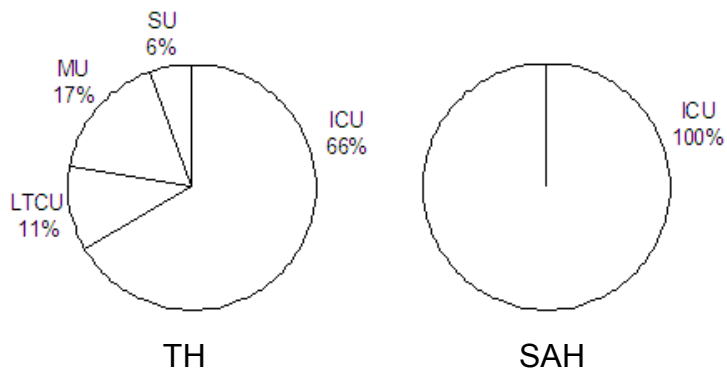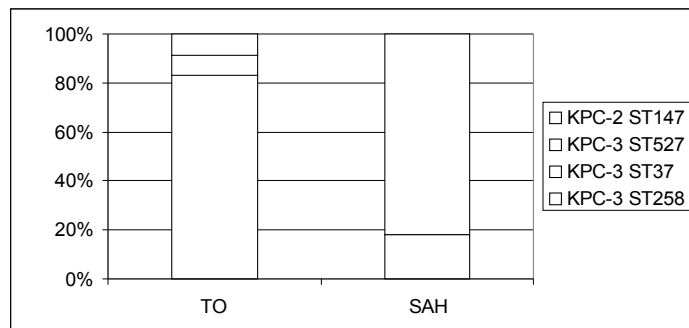

## Jul 2010-Dec 2011

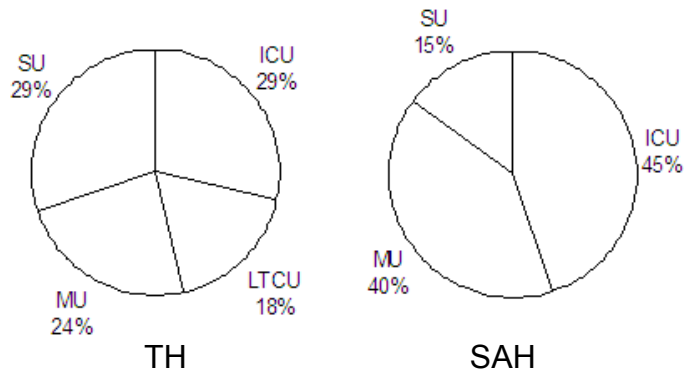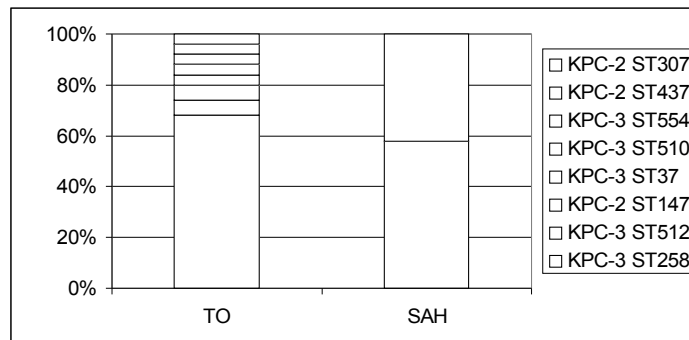

Supplement: MOESM1 [file 9665512]
